# Supplementary material for: NFIA and GATA3 are crucial regulators of embryonic articular cartilage differentiation
Source: Oxford University Press journal article supplement (doi:10.1242/dev.156554), 2018-01-15
Supplement: dev156554supp.pdf [file dev156554supp.pdf]

SUPPLEMENTARY FIGURES

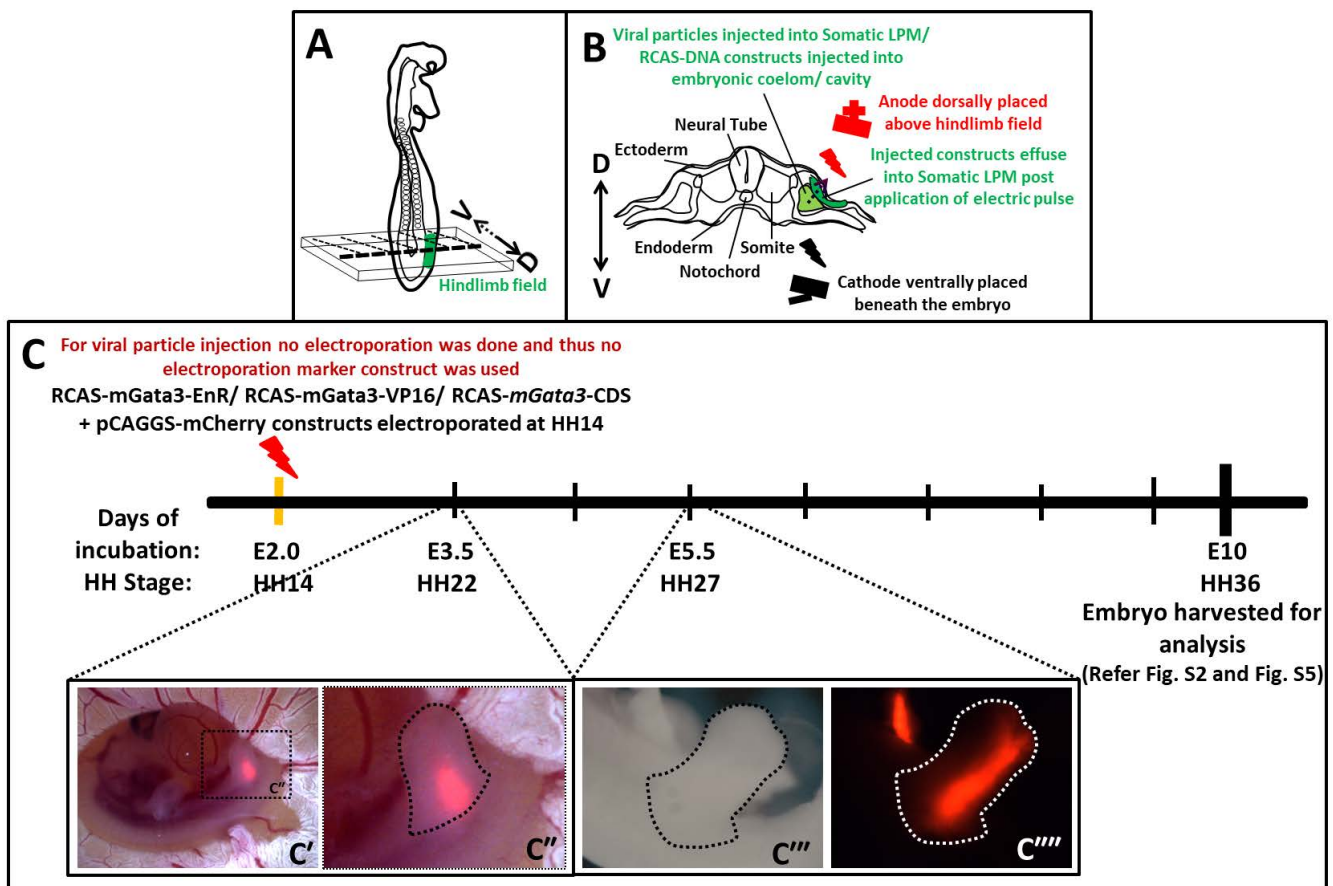

**Fig. S1. Schematic representation of the experiments carried out in this study.** (A) In a HH14 stage chick embryo limb fields are recognized as small protuberances at specific locations along the body wall of the embryo or LPM (lateral plate mesoderm). Hindlimb field is marked in green. (B) A transverse section of the limb field represented in (A) along the dorso-ventral (D-V) axis. At stage HH14 the DNA constructs or retroviral particles, mixed with 0.1% fast green, was injected into the embryonic space between the somatic LPM and splanchnic LPM at a concentration of  $2\mu\text{g}/\mu\text{l}$  using a microinjector. Post-microinjection electroporation is performed if DNA construct was injected. As soon as the DNA was injected platinum cathode was placed within the albumin beneath the yolk sac while an L-shaped anode was placed in parallel to the embryo over the hindlimb field before electric pulses (10V, 50ms pulse-on, 950ms pulse-off, five repetitions) were applied. Injected constructs get inside the nucleus of the cells on the dorsal side of the LPM, called the somatic LPM which eventually gives rise to limb buds as represented in (C''). (C) Timeline of the experimental setup. At stage HH14 RCAS construct RCAS-*mGata3*-CDS or RCAS-GATA3DBD-VP16 or RCAS-GATA3DBD-EnR mixed with  $0.5\mu\text{g}/\mu\text{l}$  pCAGGS-mCherry was electroporated as represented in panel (B). (C') At stage HH22 expression of mCherry within the limb bud indicates successful electroporation. (C'') Magnified image of the hindlimb region marked in (C') represents the mCherry expression within the limb bud. (C''') represents mCherry expression at day5.5 i.e. HH27. (C''') is the bright-field image of the same limb bud. All the embryos analysed in this study were harvested at HH36.

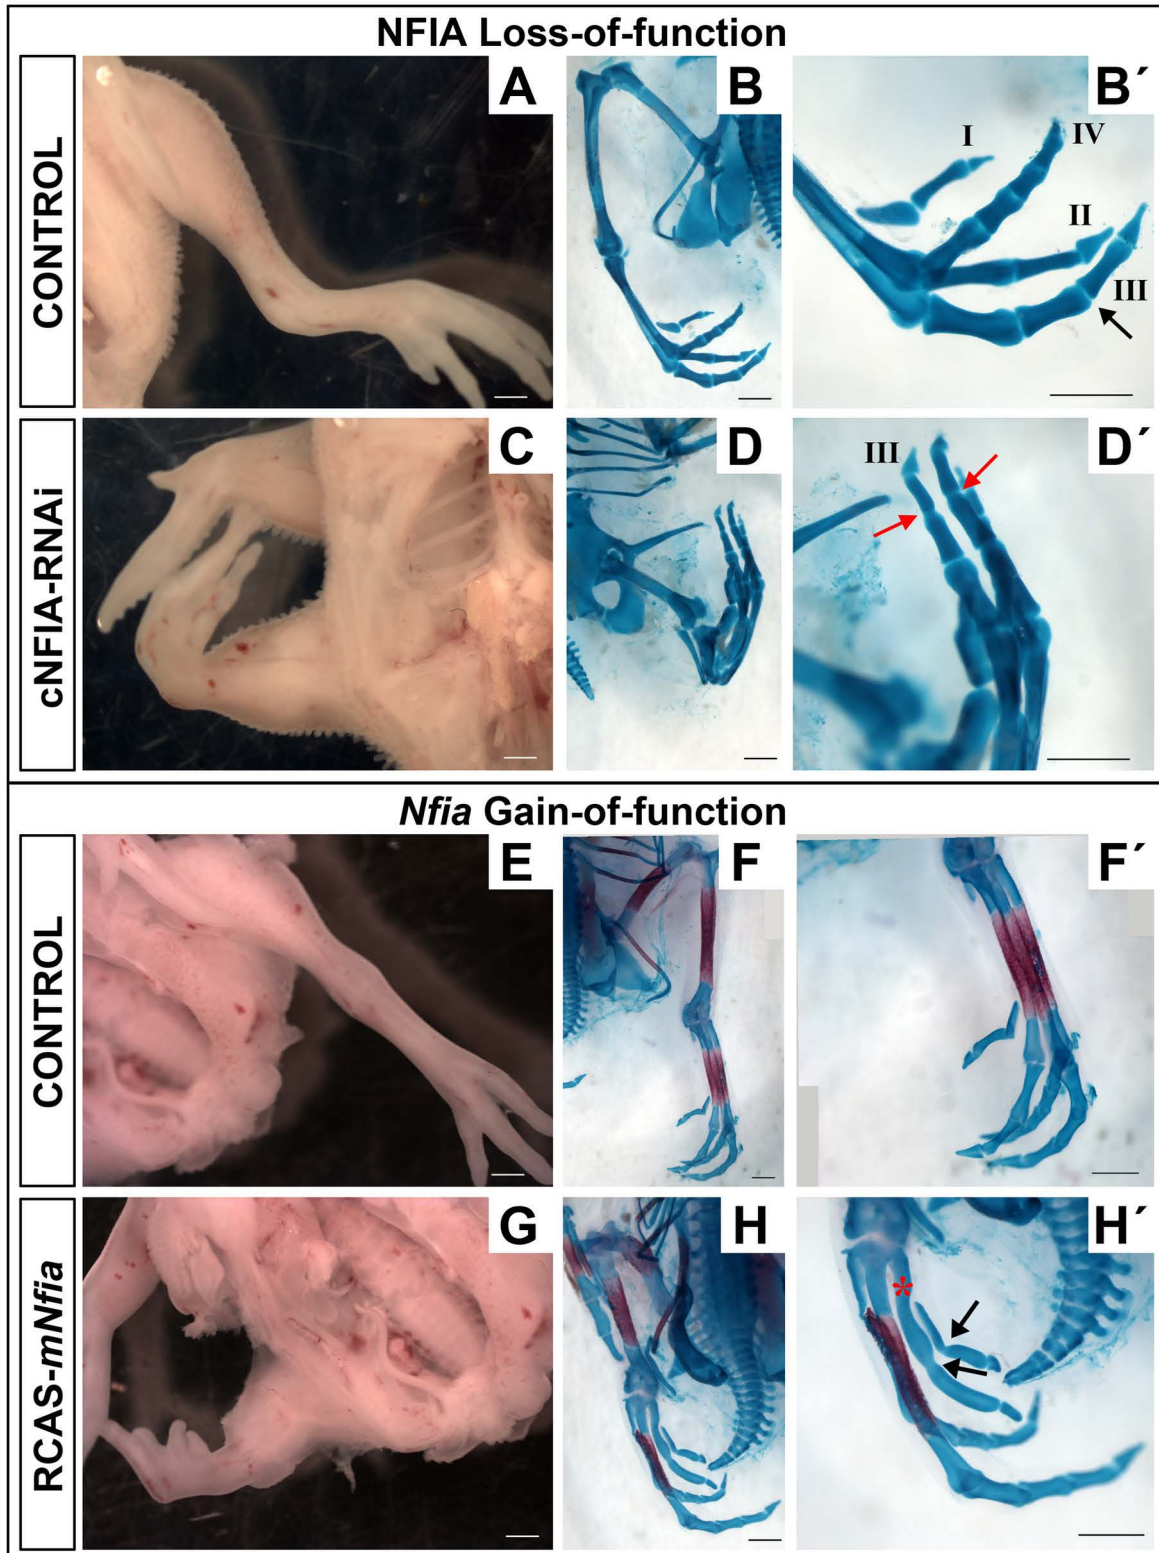

**Fig. S2. Skeletal prep analysis of RCAS-cNFIARNai and RCAS-mNfia infected limbs compared to respective uninfected contralateral control limbs.** Whole mount view of unfixed, unstained RCAS-cNFIARNai infected limb (C) compared with uninfected contralateral control (A) at HH36. (B) Alcian blue stained uninfected contralateral control limb, (B') shows magnified view of the phalangeal region where black arrow marks the segmented joint between the second and the third phalanx in the third digit. (D) Alcian blue stained RCAS-cNFIA-shRNAi infected limb, (D') shows magnified view of the phalangeal region where red arrow marks the unsegmented joint between the second and the third phalanx in the third digit. Whole mount view of unfixed, unstained RCAS-mNfia infected limb (G) compared with uninfected contralateral control (E) at HH36. (F) Alcian blue-alizarin red stained uninfected contralateral control limb and (F') shows magnified view of the meta-tarsus. (H) Alcian blue-alizarin red stained RCAS-mNfia infected limb and (H') shows magnified view of the meta-tarsus, arrows marks the unsegmented skeletal elements, red asterisk marks the element showing reduced alizarin red staining. Scale bar- 1mm.

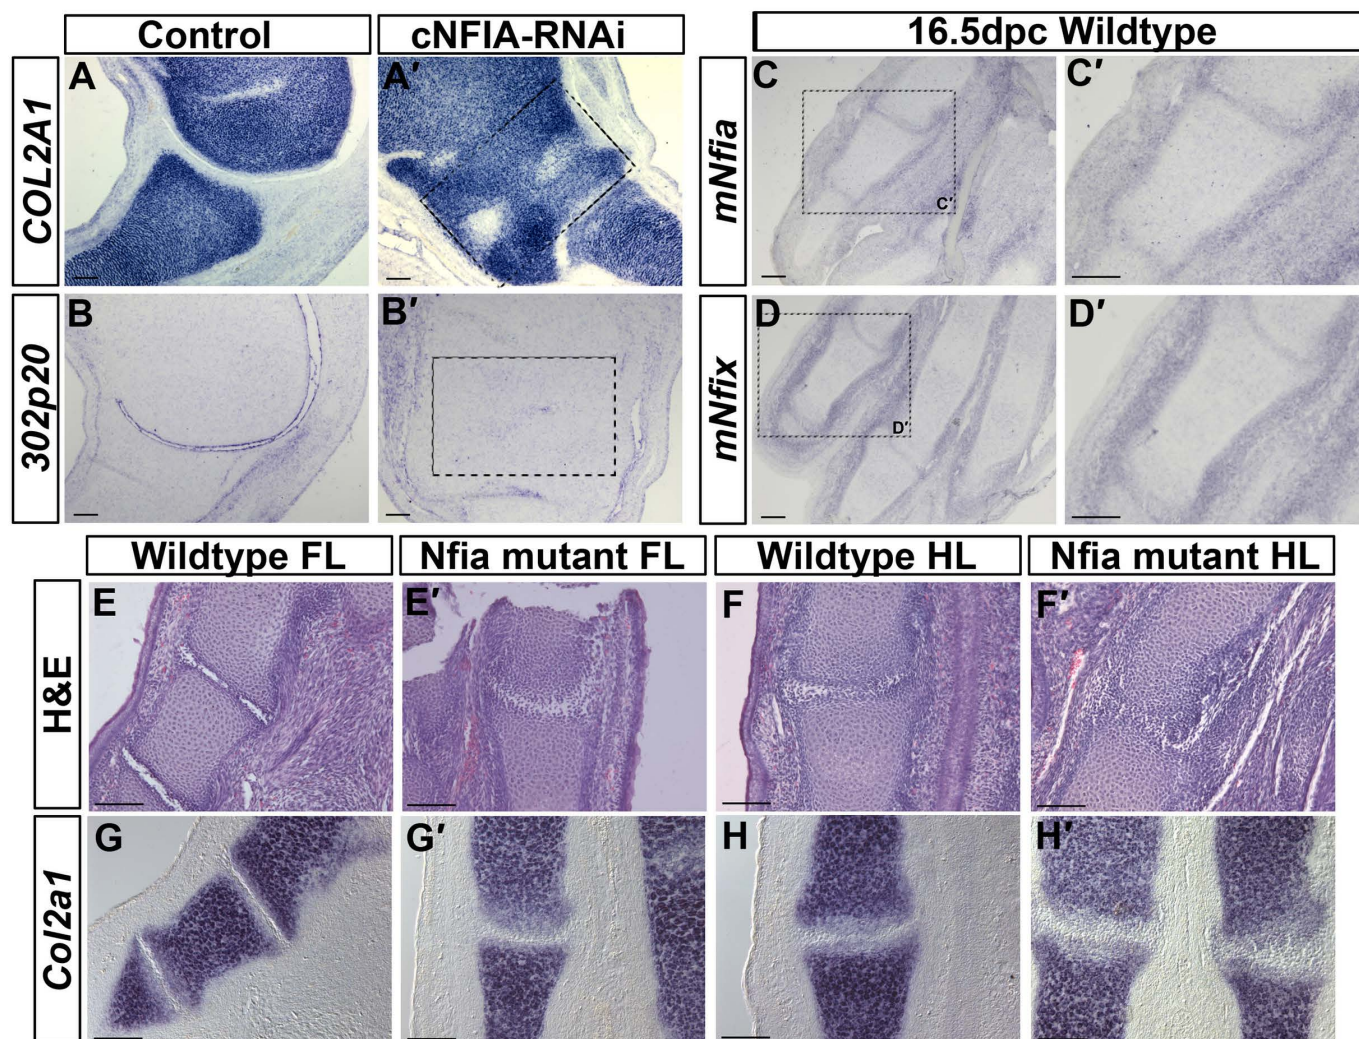

**Fig. S3. NFIA loss-of-function leads to loss of interzone markers.** (A,B) represent tibio-tarsal joint of an uninfected contralateral control limb and (A',B') represent RCAS-*cNFIA-RNAi* infected tibio-tarsal joint region. RNA *in situ* hybridization images for *COL2A1* (A and A'), *ChEST302p20* (B and B'). (C and D) RNA *in situ* hybridization images form *Nfia* and *mNfix* respectively, (C' and D') shows magnified region from (C and D). (E-H) MTP joint of WT control and (E'-H') *Nfia* mutant limbs. (E, E', F and F') Hematoxylin and Eosin staining. (G, G', H and H') RNA *in situ* hybridization for mouse *Col2a1*. Scale bar- 100  $\mu$ m.

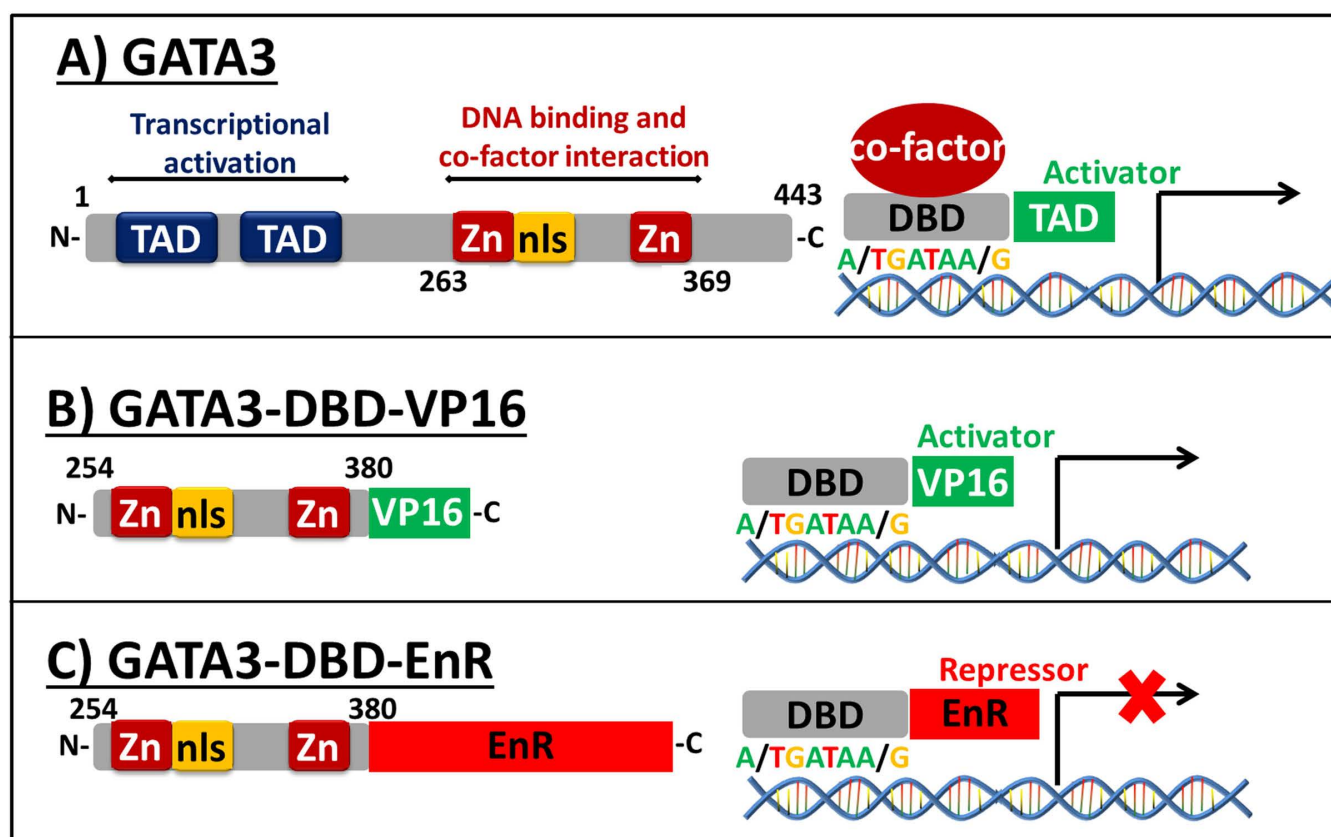

**Fig. S4. Strategy adopted for generation of Gata3 gain-of-function and loss-of-function constructs.** (A) Represents a full length mouse-GATA3 protein comprising of two amino-terminal transactivation domains followed by two zinc finger domains. (B) GATA3-DBD-VP16 represents a constitutively active form of GATA3 generated by fusion of an in-frame strong trans-activator VP16 at the C-terminus of mGATA3 DNA binding domain. Thus constitutively transcribing the genes modulated by GATA3 binding. (C) GATA3-DBD-EnR represents a constitutively active form of GATA3 generated by fusion of an in-frame strong repressor EnR at the C-terminus of mGATA3 DNA binding domain. Thus constitutively repressing the genes modulated by GATA3 binding. The constructs were made as per method described by Kamei et al. (2011).

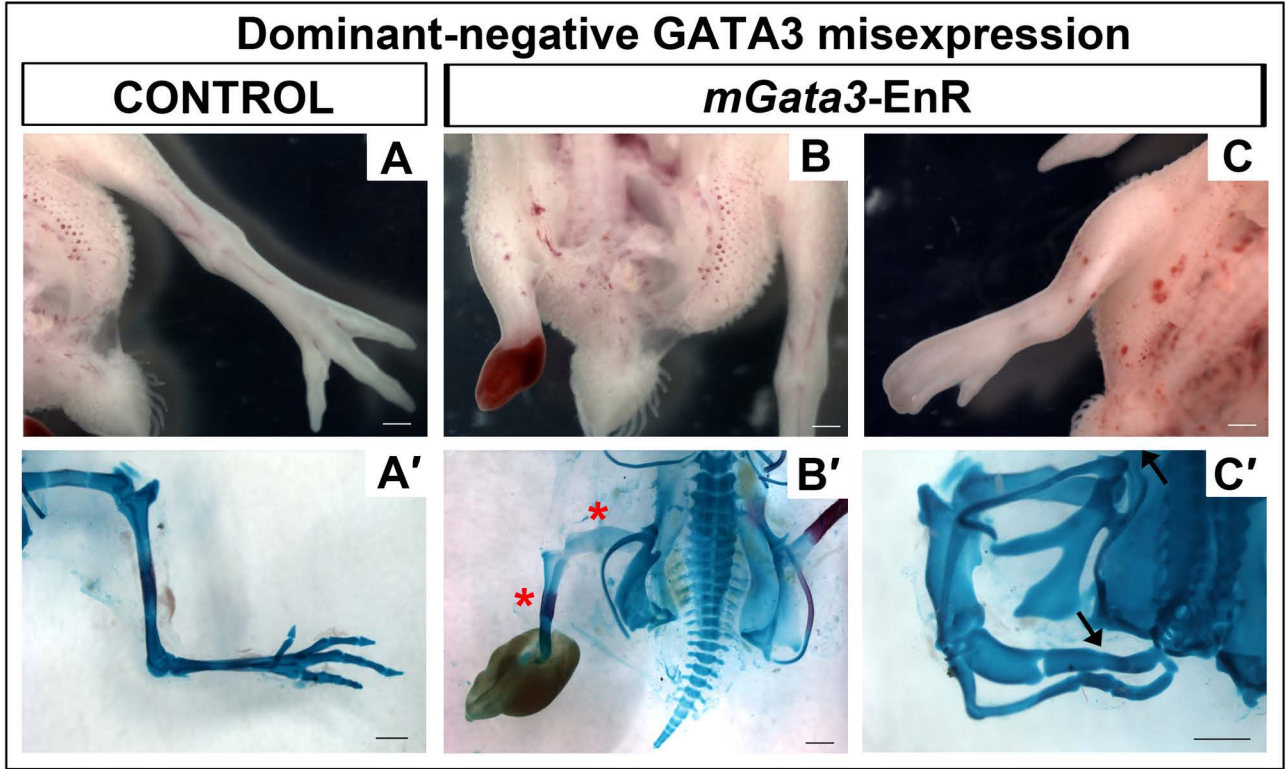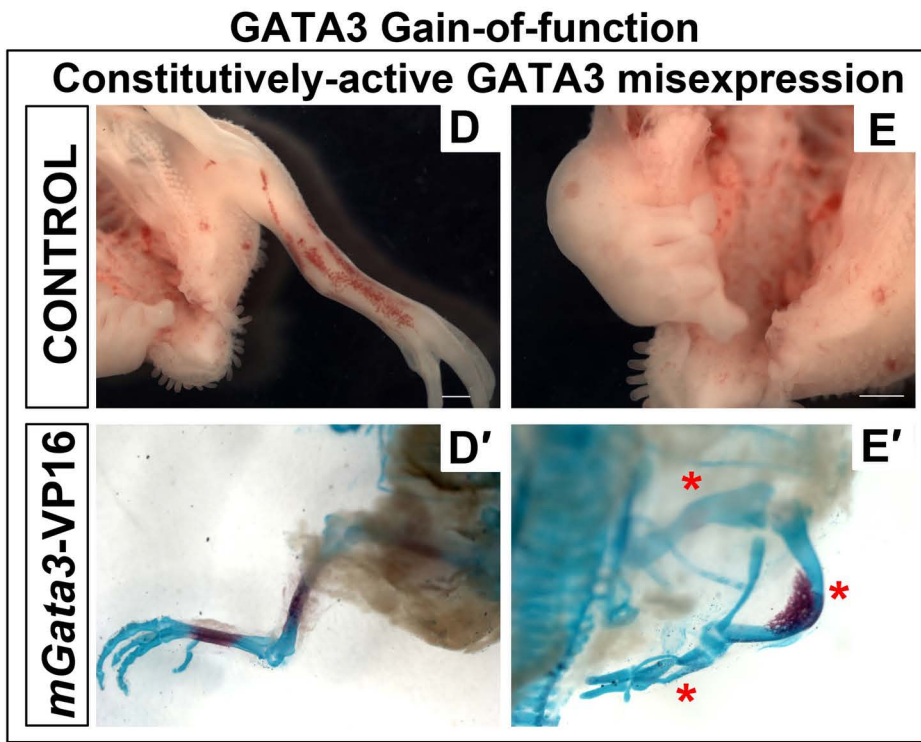

**Fig. S5. *Gata3*-EnR and *Gata3*-VP16 infected limbs compared to respective uninfected contralateral control limbs.** Whole mount view of unfixed, unstained RCAS-*Gata3*-EnR infected limb (B and C) and uninfected contralateral limb (A) at HH36. Alcian blue-alizarin red stained uninfected contralateral control limb (A') and RCAS-*Gata3*-EnR infected limb with severe (B') to less severe (C') skeletal deformity. Arrows mark the unsegmented skeletal elements; red asterisks mark the elements showing reduced alizarin red staining. Whole mount view of unfixed, unstained RCAS-*Gata3*-VP16 infected limb (E) and uninfected contralateral limb (D) at HH36. Alcian blue-alizarin red stained whole mount skeletons from (D') uninfected contralateral control limb and (E') RCAS-*Gata3*-VP16 infected limb, where red asterisks mark the elements showing reduced alizarin red staining. Scale bar- 1mm.



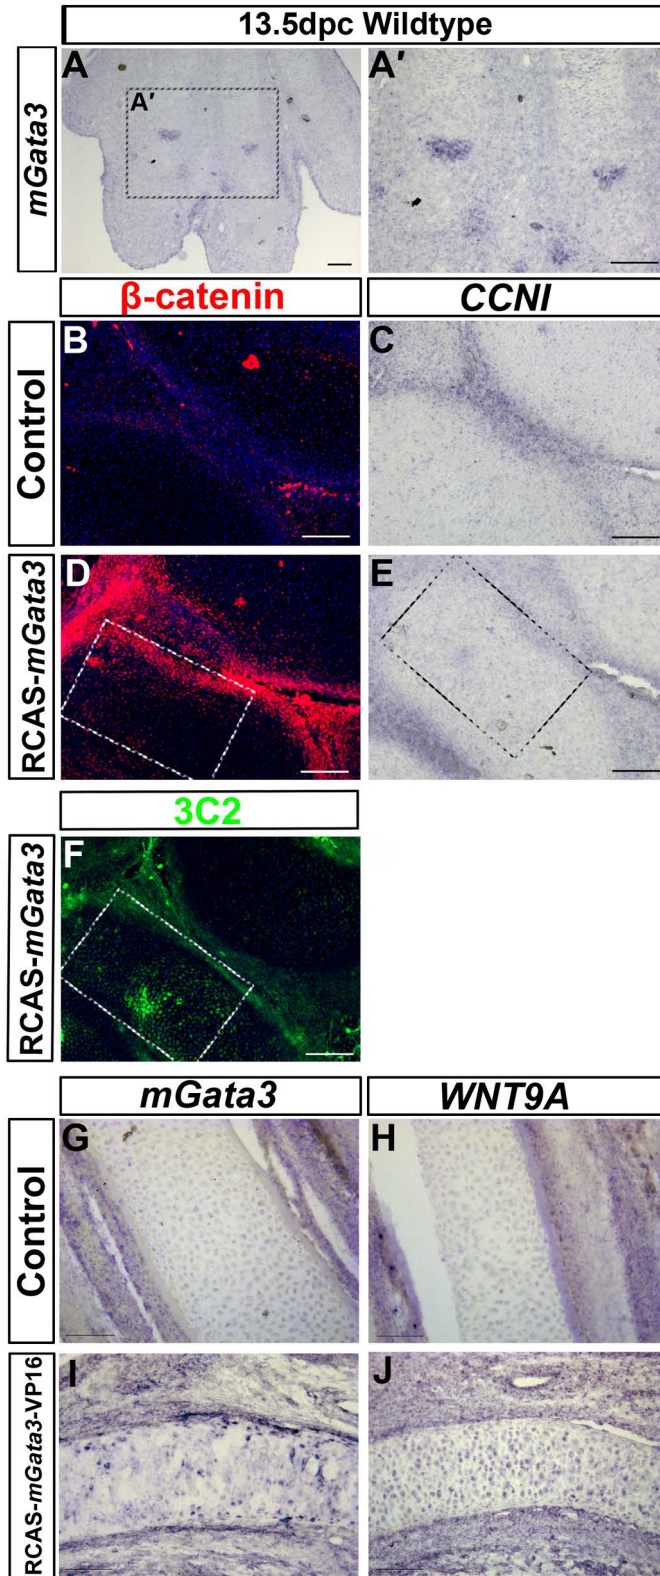

**Fig. S6. Gata3 gain-of-function.** (A) Expression of mouse *Gata3* mRNA in 13.5dpc mouse hindlimb digits. (A') Magnified view of the boxed region in Panel A. (B-F) CCNI, an articular cartilage specific gene, is not overexpressed when mGata3 is virally misexpressed. (B and C) represent endogenous level of  $\beta$ -catenin immuno-reactivity (B) and CCNI mRNA expression (C) in tibio-tarsal joint of an uninfected contralateral control chick limb. (D and E)  $\beta$ -catenin immuno-reactivity (D), and CCNI mRNA expression (E), in the RCAS-m*Gata3*-cDNA infected HH36 tibio-tarsal joint region. (F) Immunohistochemistry with 3C2 (antibody against the viral gag protein) on a section serial to the ones used in panels D and E marks the viral infection domain in green within the boxed region. (G-J) Overexpression of mGata3-VP16 causes ectopic expression of Wnt9a. (G) RNA *in situ* hybridization against *mGata3* in non-infected contralateral control tibia. (H) RNA *in situ* hybridization against *WNT9A* in non-infected contralateral control tibia. (I) RNA *in situ* hybridization against mGata3 highlights the mGata3-VP16 infected tibia. (J) Ectopic expression of Wnt9a in the mGata3-VP16 infected tibia. I and J are serial sections. Scale bar- 100  $\mu$ m.

**Table S1: Articular cartilage specific genes that were identified as transcriptional targets of Gata3 in the microarray profiling performed by Kourous-Mehr et al. (2006).**

| ID_REF | VALUE | Avalue | Description                                              | Symbol |
|--------|-------|--------|----------------------------------------------------------|--------|
| 22436  | 3.019 | 9.499  | ectonucleotide pyrophosphatase/phosphodiesterase 2 (Atx) | Enpp2  |
| 36565  | 1.904 | 9.611  | cyclin I                                                 | CCNI   |
| 11991  | 1.364 | 8.416  | hypoxia inducible factor 1, alpha subunit                | HIF1A  |
| 29726  | 1.112 | 9.046  | cadherin 11                                              | CDH11  |
| 14359  | 0.889 | 10.04  | fibulin 1                                                | FBLN1  |
| 18280  | 0.685 | 8.686  | tenascin C                                               | TNC    |
| 7418   | 0.412 | 12.638 | growth differentiation factor 5                          | GDF5   |
| 13997  | 0.384 | 9.399  | chordin                                                  | CHRD   |
| 12648  | 0.356 | 15.331 | insulin-like growth factor binding protein 4             | IGFBP4 |
| 12398  | 0.351 | 11.785 | wingless-type MMTV integration site 9A                   | Wnt9a  |
| 31109  | 0.268 | 10.412 | secreted frizzled-related sequence protein 2             | SFRP2  |
| 27708  | 0.226 | 15.643 | clusterin                                                | CLU    |
| 13437  | 0.214 | 11.113 | chondroitin sulfate proteoglycan 2 (versican)            | CSPG2  |
| 35186  | 0.189 | 10.053 | nuclear factor I/A                                       | NFIA   |
| 14761  | 0.07  | 8.062  | GLI-Kruppel family member GLI3                           | GLI3   |
| 8289   | 0.016 | 12.726 | catenin (cadherin associated protein), beta 1, 88kDa     | CTNNB1 |

#ID\_REF = Unique Identifier

#VALUE = Lowess M Log Ratio (F635 Median, F532 Median),  $\log_2(\text{Het} / \text{Null})$  where Het = fluorescence intensity of WAP-rfTA-Cre;GATA-3<sup>fllox/+</sup> sample and Null = fluorescence intensity of WAP-rfTA-Cre;GATA-3<sup>fllox/fllox</sup> sample

#Avalue = Lowess A Log Ratio (F635 Median, F532 Median)

**Supplementary Table 2: List of clones used**

| <b>Genes</b>                                                                         | <b>ChEST ID/<br/>Source</b> |
|--------------------------------------------------------------------------------------|-----------------------------|
| <i>SFRP2</i>                                                                         | ChEST712d9                  |
| <i>Atx</i>                                                                           | ChEST520a5                  |
| <i>c-Jun</i>                                                                         | ChEST520g15                 |
| <i>ERG</i>                                                                           | Cloned                      |
| <i>PTHRP</i>                                                                         | Minina et al.,<br>2001      |
| <i>NFIA</i><br><i>Nuclear factor I/A</i>                                             | ChEST86419                  |
| <i>mNFIA</i>                                                                         | Deneen et al.,<br>2006      |
| <i>mNFIX</i>                                                                         | IRAV 3491917                |
| <i>mGATA3</i>                                                                        | Kamei et al.,2011           |
| <i>PHLDA2</i><br><i>Pleckstrin homology-<br/>like domain, family A,<br/>member 2</i> | ChEST533e11                 |
| <i>Finished cDNA clone</i><br><i>ChEST302p20</i>                                     | ChEST302p20                 |
| <i>CCNI</i><br><i>Cyclin I</i>                                                       | ChEST605d20                 |
| <i>GDF5</i>                                                                          | Hartmann et al.,<br>2001    |
| <i>BMP4</i>                                                                          | Francis et al.,<br>1994     |
| <i>COL2A1</i>                                                                        | Hartmann et al.,<br>2001    |

|                |                        |
|----------------|------------------------|
| <i>mCOL2A1</i> |                        |
| <i>WNT9a</i>   | ChEST592n13            |
| <i>GATA3</i>   | ChEST663o17            |
| <i>IHH</i>     | Minina et al.,<br>2001 |
| <i>PTHrPR</i>  | Minina et al.,<br>2001 |

Hartmann C, Tabin CJ. 2001. Wnt-14 plays a pivotal role in inducing synovial joint formation in the developing appendicular skeleton. *Cell* 104:341-351.

Minina E, Wenzel HM, Kreschel C, Karp S, Gaffield W, McMahon AP, Vortkamp A. 2001. BMP and Ihh/PTHrP signaling interact to coordinate chondrocyte proliferation and differentiation. *Development* 128:4523-4534.

Kamei, C. N., Kempf, H., Yelin, R., Daoud, G., James, R. G., Lassar, A. B., Tabin, C. J., and Schultheiss, T. M. (2011). Promotion of avian endothelial cell differentiation by GATA transcription factors. *Dev Biol* 353, 29-37.

Deneen, B., Ho, R., Lukaszewicz, A., Hochstim, C. J., Gronostajski, R. M., and Anderson, D. J. (2006). The transcription factor NFIA controls the onset of gliogenesis in the developing spinal cord. *Neuron* 52, 953-968.

Francis PH, Richardson MK, Brickell PM, Tickle C. 1994. Bone morphogenetic proteins and a signalling pathway that controls patterning in the developing chick limb. *Development* 120:209-218.
